# Supplementary material
Source: PubMed Central journal article supplement (PMC5880208)
Supplement: NIHMS952778-supplement-Supplemental_Materials.pdf [file NIHMS952778-supplement-Supplemental_Materials.pdf]

# Supplemental Materials

## S1. Natural History Model of lung cancer

### Exponential growth of a primary tumor

We developed a natural history model for lung cancer (1); a summary diagram is shown in **Supplemental Figure S1**, in which the x-axis is time,  $T$ , and the y-axis is a tumor volume,  $V(t)$  at time  $T = t$ . An initial tumor has a size  $V_0$  at  $T = 0$  assumed to be  $1\text{mm}^3$ , which grows exponentially with  $V(t) = V_0 \exp(rt)$ , where  $r$  is a growth rate parameter with corresponding tumor volume doubling time (TVDT) given as  $(\log 2)/r$ . When the tumor size reaches a certain size,  $V_p$ , it promotes symptoms that lead to a clinical detection due to the primary tumor; and this  $V_p$  and growth rate  $r$  are modeled bivariate log-normal distributed, with two mean parameters  $\mu_p, \mu_r$ , and three covariance parameters,  $\sigma_1, \sigma_2$  and  $\sigma_3$ .

### Growth of metastasis and survival

A metastasis starts growing at time  $T = T_{OM}$  and we assume the volume at this time ( $V_C$ ) is a threshold for cure (cure threshold) so that if the tumor is detected and treated earlier than this point, it can be cured otherwise it is not curable. And this volume is modeled to be Weibull distributed with  $K_1$  and  $K_2$  for shape and scale parameters. So this metastatic burden  $B(t)$  grows also proportionally to the primary tumor size with the relation  $B(t) = (V(t) - V_C)f$  with unobservable fraction  $f$  until it reaches a maximum burden size  $B_D$  at time  $T = T_D$ , which is a survival time in case the tumor is not detected and cured before reaching the cure threshold  $V_C$ . And this maximum burden divided by the fraction  $f$ ,  $B_D / f$  is modeled to be Weibull distributed (with  $L_1$  and  $L_2$  as shape and scale parameters) to avoid non-identifiability.

### Staging

If this metastatic burden grows to a certain size,  $c_1 B_D$  at time  $T = T_{MO}$ , which is a fraction of the maximum burden, it becomes an observable metastasis so that if a detection (either clinical detection or screen detection) occurs earlier than this point, it's an early staged tumor otherwise it's an advanced staged tumor.

### Clinical detection

When the metastatic burden keeps growing to a certain size,  $c_2 B_D$  at time  $T = T_M$ , it promotes a detection due to metastasis; and whichever comes first—either the detection due to the primary tumor,  $T_p$  or due to metastasis,  $T_M$  becomes the clinical detection time. In the example shown in **Supplemental Figure S1**, the detection is due to the primary tumor.  $c_1$  and  $c_2$  are regarded as fixed constants across different tumors that need to be estimated from data.

## S2. Parameter estimation of natural history model for lung cancer

### SEER data

The parameters of the natural history model were estimated using National Cancer Institute Surveillance, Epidemiology and End Results (SEER) survival data for cancer cases diagnosed between 1988 and 2003 (hence in the absence of screening) for each histologic subtype (adenocarcinoma, squamous, large cell and small cell) and gender. The data include 66732 male and 60166 female and provide information on tumor size ( $D$ ) and stage at clinical detection ( $A$ ) and survival time ( $S$ ) up to 15 years. For estimation purposes, tumor diameters at clinical detection were discretized into 6 bins (0-2, 2-2.9, 3- 3.9, 4-4.9, 5-6.9, >7 cm survival times were discretized into 1-year intervals up to 15 years, and stage into early (I-II) or advanced (III-IV).

### Maximum likelihood Estimation

We have a total of 11 parameters  $\theta = (\mu_r, \mu_p, \sigma_1, \sigma_2, \sigma_3, K_1, K_2, L_1, L_2, c_1, c_2)$  for the natural history model for each histologic subtype and each gender. The parameters were estimated using maximum likelihood approach, with the likelihood function given as:

$$L(\theta) = \left[ \prod_{j=0}^6 \prod_{k=0}^1 \prod_{l=0}^{14} \Pr(D(\theta) \in [d_j, d_{j+1}), A(\theta) = k, S(\theta) \in [s_l, s_{l+1})) \right]^{N_{jkl}^E} \times \left[ \prod_{j=0}^6 \prod_{k=0}^1 \prod_{l=0}^{15} \Pr(D(\theta) \in [d_j, d_{j+1}), A(\theta) = k, S(\theta) > s_l) \right]^{N_{jkl}^C}, \text{ where } D(\theta) \text{ is tumor}$$

size,  $A(\theta)$  is stage,  $S(\theta)$  is survival time, and  $N_{jkl}^E$  is the count of lung cancer cases who die of lung cancer with tumor size at  $[d_j, d_{j+1})$ , stage at  $K$  and survival time on  $[s_l, s_{l+1})$ , and  $N_{jkl}^C$  is the count of lung cancer cases who were censored due to other cause of mortality or loss-to-follow-up until  $l$  years with tumor size at  $[d_j, d_{j+1})$ , stage at  $K$ .

In assessing the value of the likelihood function for a given parameter  $\theta$ , we use an empirical approach, which is based on simulations; we sample hundreds of thousands of lung cancer patients by sampling parameters from given distributions of natural history parameters (e.g. Weibull or bivariate log-normal distribution). Then to estimate the probability of an event for a given category defined by tumor size, stage and survival time, i.e.  $\Pr(D(\theta) \in [d_j, d_{j+1}), A(\theta) = k, S(\theta) \in [s_l, s_{l+1}))$ , simply count the number of individuals belonging to the category and divide it by the total number of individuals simulated. Simulation size  $N = 100,000$  was used for each likelihood value calculation. A stepwise estimation method was used to estimate the parameters based on Nelder-Mead algorithm; a vector of parameters was partitioned in to four sections

$\theta = (\mu_r, \mu_p, \sigma_1, \sigma_2, \sigma_3; K_1, K_2; L_1, L_2; c_1, c_2)$  and each section of the parameters was estimated and updated sequentially through optimizations conditioning on the rest of parameters as fixed; the procedure was repeated until the procedure reaches convergence. In order to check convergence, ~700 different initial parameter sets were used that cover the wide range of the whole parameter space. The estimated parameters for each subtype and gender are shown in **Supplemental Table S3** and plots comparing model fits to SEER data (male) are shown in **Supplemental Figure S2**. We note that these are updated estimates compared to the ones previously reported (1).

### Low Malignant Potential Tumor (LMP)

In addition to the four major histologic subtypes, we also modeled low malignant potential tumor including bronchioloalveolar cancer, which is commonly detected through LDCT, but not typically detected in the absence of screening. Hence SEER data with patients diagnosed in the absence of screening doesn't include enough information to fit the model for growth and survival of this type of tumor. Hence in order to model low malignant potential tumor, we based it on the natural history parameters of adenocarcinoma, but adjusted its growth rate and cure threshold by fitting the model to NLST data through calibrations that will be described later (See **Section 3.1** and **Supplemental Materials Section S3**); also prediction for its incidence, that is, time for clinical detection in the absence of screening using TSCE was adjusted and estimated through calibrations since predictions by TSCE are based on estimation for the major subtypes, and hence cannot be directly applied for low malignant potential tumor. We note that LMP is a new feature to our model compared to the one used in the previous reports (2, 3).

### S3. Calibration

#### Calibration Method

Specifically, for a given set of calibration parameters, a microsimulation is performed to predict outcomes—such as LC status, detection mode and survival time—for each participant in the NLST. Then study-level outcomes parameters are summarized by counting the LC incidence and mortality among all participants over the study period from year 1 to year 6 (i) by detection mode (screen detection or clinical (interval) detection), (ii) by screening arm (LDCT/CXR) and are compared to the observed outcomes in NLST data. After obtaining study-level outcomes for the given set of

calibration, a goodness-of-fit measure is calculated as:  $F_i = \sum_{t=1}^6 \frac{|O_t - E_t|}{E_t}$ , where  $O_t$  is observed count

and  $E_t$  is predicted count for time  $t$  ( $t = 1,2,3,4,5,6$ ) for each table for LC incidence or mortality by

arms and detection mode; and finally compute  $F = \sum_{i=1}^8 F_i$  for 8 tables defined by (incidence, mortality)

x (CT, CXR) x (screen, interval). A set of parameters that minimizes  $F$  was chosen as the final parameters to be used for the subsequent analyses.

#### Calibration Target Parameters

The calibration target parameters and their considered ranges are shown in **Supplemental Table S4**: CT and CXR detection thresholds with ranges 2mm-5mm and 20mm-25mm for CT and CXR respectively; the tumor size threshold for diagnostic follow-up with range 5-10mm; lung cancer incidence time adjustment, i.e. lung cancer clinical detection time adjustment (CDTA1) so that it advances the predicted incidence age using TSCE model by 1-5 years; this was done since TSCE was estimated using NHS/HPF data that include a large proportion of non-smokers and showed discrepancy between observed and predicted outcomes especially for heavy smokers (data not shown); especially the discrepancy became more severe as individuals are heavier smokers (increased smoking duration and intensity). Hence in addition to CDTA1 that is applied for all participants in the simulation, a second adjustment for clinical detection time (CDTA 2) was made only for heavy smokers defined by a given threshold  $K$ ; the levels of smoking is well summarized in annual hazard estimation (using TSCE) which is the function of mainly smoking (and gender), and hence summation of predicted hazard from age 50 to 100 was used as a measure of threshold  $K$ .

The considered range of  $K$  was 0.8 to 1.2 which needs to be decided by fits to data through calibration. Lastly, low malignant potential tumor (LMP) related parameters such as tumor growth rate parameter  $r$  and cure threshold related parameter and clinical detection time adjustment for low malignant tumor (CDTA3), which needs to be delayed this time since the LMP is not symptomatically detected until later in life. See the ranges of these values in **Supplemental Table S4**.

## Supplemental Tables

**Table S1.** Example profiles of individuals with input information and predicted outcomes using our microsimulation model for lung cancer screening

|                                | Input and output variables                                | Profile 1 | Profile 2 | Profile 3   | Profile 4 |
|--------------------------------|-----------------------------------------------------------|-----------|-----------|-------------|-----------|
| Input Variables                | Gender                                                    | Male      | Male      | Male        | Male      |
|                                | Smoking Status                                            | Former    | Current   | Current     | Current   |
|                                | Smoking Start Age                                         | 14        | 18        | 17          | 18        |
|                                | Smoking Quit Age                                          | 54        | -         | -           | -         |
|                                | Cig/Day                                                   | 20        | 30        | 30          | 15        |
|                                | Age at entry                                              | 64        | 69        | 60          | 64        |
| Lung Cancer Incidence          | Lung Cancer Case                                          | Yes       | Yes       | Yes         | No        |
|                                | Age at Clinical Detection of lung cancer                  | 71.78     | 71.92     | 62.62       | -         |
| Natural history of lung cancer | Histology                                                 | AD        | SQ        | AD          | -         |
|                                | Cure Threshold <sup>1</sup> (mm)                          | 11.82     | 11.71     | 10.89       | -         |
|                                | Tumor Volume                                              | 187       | 124       | 144         | -         |
|                                | Doubling Time (days)                                      |           |           |             |           |
|                                | Clinical Detection Time from $V_0$ <sup>2</sup> (years)   | 7.78      | 2.92      | 2.62        | -         |
|                                | Time from clinical detection to survival (years)          | 1.29      | 1.25      | 3.03        | -         |
|                                | Tumor Size at Clinical Detection (mm)                     | 84.21     | 24.29     | 25.32       | -         |
| Screening                      | Screen Mode                                               | LDCT      | LDCT      | LDCT        | LDCT      |
|                                | Detection Threshold (mm)                                  | 3.1       | 4.3       | 4.21        | -         |
|                                | Tumor size at Screen time=0 (mm)                          | 2.97      | 3.33      | 5.46        | -         |
|                                | Tumor size at screen time=1 (mm)                          | 4.67      | 6.57      | 9.81        | -         |
|                                | Tumor size at screen time=2 (mm)                          | 7.33      | -         | -           | -         |
| Detection                      | Detection Mode                                            | Screen    | Screen    | Screen      | -         |
|                                | Tumor Detection Time (year)                               | 1         | 1         | 0           | -         |
|                                | Tumor size at detection (mm)                              | 4.67      | 6.57      | 5.46        | -         |
| Diagnosis                      | Number of diagnostic follow-ups                           | 3         | 2         | 2           | -         |
|                                | Time to diagnosis from randomization (years)              | 2.75      | 1.62      | 1.25        | -         |
|                                | Diagnostic delays (years)                                 | 1.75      | 0.62      | 1.25        | -         |
|                                | Tumor size at diagnosis (mm)                              | 10.28     | 10.04     | 11.36       | -         |
|                                | Tumor Stage at diagnosis                                  | Early     | Early     | Early       | -         |
|                                | Age at diagnosis                                          | 66.75     | 70.62     | 61.25       | -         |
| Survival /Death                | Cured from lung cancer                                    | Yes       | Yes       | No          | -         |
|                                | Cause of Death                                            | Other     | Other     | Lung Cancer | Other     |
|                                | Age for other cause of mortality                          | 77.3      | 88.7      | 72.5        | 83.84     |
|                                | Age of death from lung cancer in the absence of screening | 73.06     | 73.18     | 65.64       | -         |
|                                | Age of death                                              | 77.3      | 88.7      | 65.64       | 83.84     |

Note:

<sup>1</sup> A tumor volume at the onset of metastasis. If the tumor is detected and treated earlier before reaching this size, it can be cured otherwise it is not curable (See Section S1. Natural History Model of lung cancer for more details)

<sup>2</sup>  $V_0$  is an initial tumor in the natural history model

**Table S2.** Histologic Subtype Distributions from SEER data

|                | Female | Male |
|----------------|--------|------|
| Adenocarcinoma | 0.43   | 0.35 |
| Squamous       | 0.23   | 0.35 |
| Large Cell     | 0.09   | 0.09 |
| Small Cell     | 0.25   | 0.21 |

**Table S3.** Natural History Parameter Estimation

| Natural History Parameter             | Female |          |            |            | Male  |          |            |            |
|---------------------------------------|--------|----------|------------|------------|-------|----------|------------|------------|
|                                       | Adeno  | Squamous | Large Cell | Small Cell | Adeno | Squamous | Large Cell | Small Cell |
| $\mu_r$                               | 0.38   | 0.64     | 0.85       | 1.40       | 0.48  | 0.68     | 0.99       | 0.99       |
| $\mu_p$                               | 1.80   | 1.93     | 2.34       | 2.36       | 2.08  | 2.04     | 2.34       | 2.81       |
| $\sigma_1$                            | 1.28   | 1.38     | 1.60       | 1.16       | 1.35  | 1.41     | 1.68       | 1.31       |
| $\sigma_2$                            | 0.80   | 0.76     | 0.90       | 0.72       | 0.86  | 0.74     | 0.79       | 0.97       |
| $\sigma_3$                            | 0.33   | 0.33     | 0.39       | 0.17       | 0.24  | 0.22     | 0.27       | 0.05       |
| $K_1$                                 | 0.31   | 0.25     | 0.25       | 0.30       | 0.30  | 0.23     | 0.21       | 0.23       |
| $K_2$                                 | 7.80   | 7.37     | 7.06       | 7.16       | 7.45  | 7.22     | 6.38       | 6.12       |
| $L_1$                                 | 0.59   | 0.74     | 0.71       | 0.56       | 0.63  | 0.79     | 0.77       | 0.70       |
| $L_2$                                 | 12.78  | 13.77    | 13.22      | 15.00      | 12.48 | 13.71    | 13.08      | 13.18      |
| $c_1$                                 | 0.08   | 0.07     | 0.12       | 0.00       | 0.18  | 0.14     | 0.21       | 0.13       |
| $c_2$                                 | 0.23   | 0.17     | 0.20       | 0.03       | 0.35  | 0.20     | 0.28       | 0.23       |
| TVDT (days)                           | 173    | 132      | 108        | 62         | 157   | 128      | 94         | 93         |
| Cure Threshold (cm)                   | 1.09   | 0.84     | 0.77       | 0.88       | 0.99  | 0.79     | 0.56       | 0.54       |
| Tumor size at clinical detection (cm) | 6.04   | 6.89     | 6.42       | 7.03       | 6.26  | 7.67     | 6.69       | 6.62       |

**Table S4.** Calibration Target Parameters and Results of Calibrations

|                                                                          | Calibration Target Parameter                                                    | Range          | Calibration Results |           |
|--------------------------------------------------------------------------|---------------------------------------------------------------------------------|----------------|---------------------|-----------|
|                                                                          |                                                                                 |                | Female              | Male      |
| Screening                                                                | CT detection threshold                                                          | 2mm-5mm        | 2.5mm               | 2.75mm    |
|                                                                          | CXR detection threshold                                                         | 20mm-25mm      | 21mm                | 21mm      |
| Diagnostic Follow-up                                                     | Tumor size threshold<br>For diagnostic follow-up                                | 5-10mm         | 8mm                 | 9mm       |
| Adjustment for predictions<br>for lung cancer clinical<br>detection time | Lung cancer clinical detection time<br>adjustment 1 (CDTA1)                     | 0-5 years      | 1 year              | 4 year    |
|                                                                          | Lung cancer clinical detection time<br>adjustment 2 (CDTA 2)                    | 4-5 years      | 4.25                | 4.75      |
|                                                                          | $K$ (hazard threshold for CDTA 2)                                               | 0.8-1.2        | 1                   | 1         |
| Low Malignant Potential<br>Tumor related parameters                      | TVDT for low malignant potential tumor                                          | 1750-2050 days | 1850 days           | 1869 days |
|                                                                          | Cure threshold for low malignant<br>potential tumor                             | 9-12cm         | 11.6cm              | 9.17cm    |
|                                                                          | Lung cancer clinical detection time<br>delays for low malignant potential tumor | 30-40 years    | 35 years            | 35 years  |

**Table S5. Model calibration results using the NLST data**

|                       | CXR arm         |            |            |             |                    |                   |            |             |                    |            | CT Arm          |             |                    |            |                   |             |                    |  |
|-----------------------|-----------------|------------|------------|-------------|--------------------|-------------------|------------|-------------|--------------------|------------|-----------------|-------------|--------------------|------------|-------------------|-------------|--------------------|--|
|                       | Screen Detected |            |            |             |                    | Interval Detected |            |             |                    |            | Screen Detected |             |                    |            | Interval Detected |             |                    |  |
|                       | Time            | O          | E          | E/O.ratio   | 95%CI              | O                 | E          | E/O.ratio   | 95%CI              | O          | E               | E/O.ratio   | 95%CI              | O          | E                 | E/O.ratio   | 95%CI              |  |
| Lung Cancer Incidence | 1               | 135        | 142        | 1.05        | (0.89-1.24)        | 52                | 62         | 1.19        | (0.93-1.53)        | 266        | 322             | 1.21        | (1.08-1.35)        | 22         | 22                | 1.00        | (0.66-1.52)        |  |
|                       | 2               | 63         | 71         | 1.13        | (0.89-1.42)        | 66                | 73         | 1.11        | (0.88-1.39)        | 163        | 149             | 0.91        | (0.78-1.07)        | 17         | 21                | 1.24        | (0.8-1.88)         |  |
|                       | 3               | 65         | 60         | 0.92        | (0.71-1.18)        | 63                | 69         | 1.1         | (0.87-1.39)        | 178        | 157             | 0.88        | (0.76-1.03)        | 27         | 34                | 1.26        | (0.9-1.76)         |  |
|                       | 4               | 14         | 5          | 0.36        | (0.15-0.86)        | 117               | 112        | 0.96        | (0.8-1.15)         | 33         | 10              | 0.3         | (0.16-0.57)        | 71         | 72                | 1.01        | (0.81-1.28)        |  |
|                       | 5               | 1          | 5          | 5           | (2.08-12.01)       | 145               | 148        | 1.02        | (0.87-1.2)         | 9          | 0               | 0           |                    | 106        | 94                | 0.89        | (0.72-1.08)        |  |
|                       | 6               | 1          | 0          | 0           |                    | 165               | 177        | 1.07        | (0.93-1.24)        | 0          | 0               | 0           |                    | 133        | 137               | 1.03        | (0.87-1.22)        |  |
|                       | <b>Total</b>    | <b>279</b> | <b>283</b> | <b>1.01</b> | <b>(0.9-1.14)</b>  | <b>608</b>        | <b>642</b> | <b>1.06</b> | <b>(0.98-1.14)</b> | <b>649</b> | <b>638</b>      | <b>0.98</b> | <b>(0.91-1.06)</b> | <b>376</b> | <b>380</b>        | <b>1.01</b> | <b>(0.91-1.12)</b> |  |
| Lung Cancer Mortality | 1               | 21         | 10         | 0.48        | (0.27-0.9)         | 14                | 9          | 0.64        | (0.32-1.21)        | 23         | 11              | 0.48        | (0.26-0.85)        | 5          | 3                 | 0.6         | (0.15-1.75)        |  |
|                       | 2               | 30         | 23         | 0.77        | (0.5-1.13)         | 40                | 41         | 1.02        | (0.77-1.41)        | 45         | 37              | 0.82        | (0.6-1.14)         | 11         | 15                | 1.36        | (0.82-2.26)        |  |
|                       | 3               | 32         | 32         | 1           | (0.71-1.41)        | 49                | 47         | 0.96        | (0.71-1.27)        | 47         | 49              | 1.04        | (0.79-1.38)        | 20         | 16                | 0.8         | (0.49-1.31)        |  |
|                       | 4               | 25         | 32         | 1.28        | (0.9-1.8)          | 68                | 65         | 0.96        | (0.76-1.23)        | 49         | 51              | 1.04        | (0.8-1.38)         | 35         | 25                | 0.71        | (0.47-1.04)        |  |
|                       | 5               | 12         | 25         | 2.08        | (1.41-3.09)        | 75                | 85         | 1.13        | (0.92-1.41)        | 31         | 45              | 1.45        | (1.09-1.95)        | 42         | 44                | 1.05        | (0.78-1.41)        |  |
|                       | 6               | 12         | 17         | 1.42        | (0.91-2.32)        | 104               | 101        | 0.97        | (0.8-1.18)         | 20         | 34              | 1.7         | (1.22-2.38)        | 64         | 65                | 1.02        | (0.79-1.29)        |  |
|                       | <b>Total</b>    | <b>132</b> | <b>139</b> | <b>1.05</b> | <b>(0.89-1.24)</b> | <b>350</b>        | <b>349</b> | <b>0.99</b> | <b>(0.9-1.11)</b>  | <b>215</b> | <b>227</b>      | <b>1.06</b> | <b>(0.93-1.2)</b>  | <b>177</b> | <b>167</b>        | <b>0.94</b> | <b>(0.81-1.1)</b>  |  |

**Table S6. Model validation results using the PLCO data for all subjects**

|                       | Chest X-ray Arm       |            |            |             |                    |                         |             |             |                    |             | Usual Care Arm          |             |                    |  |
|-----------------------|-----------------------|------------|------------|-------------|--------------------|-------------------------|-------------|-------------|--------------------|-------------|-------------------------|-------------|--------------------|--|
|                       | Screen Detected Cases |            |            |             |                    | Interval Detected Cases |             |             |                    |             | Interval Detected Cases |             |                    |  |
|                       | Time                  | O          | E          | E/O ratio   | 95% CI             | O                       | E           | E/O ratio   | 95% CI             | O           | E                       | E/O ratio   | 95% CI             |  |
| Lung Cancer Incidence | 1                     | 116        | 121        | 1.04        | (0.87-1.24)        | 44                      | 48          | 1.09        | (0.83-1.46)        | 96          | 95                      | 0.99        | (0.81-1.21)        |  |
|                       | 2                     | 55         | 60         | 1.09        | (0.85-1.41)        | 63                      | 56          | 0.89        | (0.68-1.15)        | 117         | 110                     | 0.94        | (0.78-1.14)        |  |
|                       | 3                     | 65         | 62         | 0.95        | (0.74-1.22)        | 71                      | 59          | 0.83        | (0.64-1.07)        | 133         | 121                     | 0.91        | (0.76-1.09)        |  |
|                       | 4                     | 63         | 66         | 1.05        | (0.83-1.34)        | 74                      | 67          | 0.91        | (0.71-1.15)        | 121         | 124                     | 1.02        | (0.86-1.22)        |  |
|                       | 5                     | 6          | 0          |             |                    | 96                      | 100         | 1.04        | (0.85-1.26)        | 146         | 134                     | 0.92        | (0.77-1.09)        |  |
|                       | 6                     | 0          | 0          |             |                    | 115                     | 110         | 0.96        | (0.79-1.15)        | 124         | 142                     | 1.15        | (0.97-1.35)        |  |
|                       | 7                     | 0          | 0          |             |                    | 166                     | 147         | 0.89        | (0.75-1.04)        | 128         | 153                     | 1.2         | (1.02-1.40)        |  |
|                       | 8                     | 0          | 0          |             |                    | 142                     | 154         | 1.08        | (0.93-1.27)        | 156         | 161                     | 1.03        | (0.88-1.2)         |  |
|                       | 9                     | 0          | 0          |             |                    | 151                     | 164         | 1.09        | (0.93-1.27)        | 146         | 155                     | 1.06        | (0.91-1.24)        |  |
|                       | 10                    | 0          | 0          |             |                    | 149                     | 169         | 1.13        | (0.98-1.32)        | 130         | 164                     | 1.26        | (1.09-1.47)        |  |
|                       | <b>Total</b>          | <b>305</b> | <b>309</b> | <b>1.01</b> | <b>(0.91-1.13)</b> | <b>1071</b>             | <b>1073</b> | <b>1.00</b> | <b>(0.94-1.06)</b> | <b>1297</b> | <b>1360</b>             | <b>1.05</b> | <b>(0.99-1.11)</b> |  |
| Lung Cancer Mortality | 1                     | 13         | 5          | 0.38        | (0.17-0.95)        | 8                       | 8           | 1           | (0.48-1.97)        | 23          | 11                      | 0.48        | (0.28-0.89)        |  |
|                       | 2                     | 36         | 18         | 0.5         | (0.33-0.81)        | 37                      | 31          | 0.84        | (0.59-1.19)        | 67          | 50                      | 0.75        | (0.57-0.98)        |  |
|                       | 3                     | 27         | 28         | 1.04        | (0.71-1.49)        | 52                      | 40          | 0.77        | (0.57-1.05)        | 82          | 73                      | 0.89        | (0.71-1.12)        |  |
|                       | 4                     | 30         | 33         | 1.1         | (0.79-1.56)        | 58                      | 46          | 0.79        | (0.59-1.06)        | 91          | 83                      | 0.91        | (0.74-1.13)        |  |
|                       | 5                     | 31         | 29         | 0.94        | (0.66-1.36)        | 50                      | 57          | 1.14        | (0.88-1.48)        | 116         | 98                      | 0.84        | (0.69-1.03)        |  |
|                       | 6                     | 19         | 24         | 1.26        | (0.86-1.91)        | 74                      | 76          | 1.03        | (0.82-1.29)        | 94          | 102                     | 1.09        | (0.89-1.31)        |  |
|                       | 7                     | 10         | 21         | 2.1         | (1.4-3.27)         | 85                      | 83          | 0.98        | (0.79-1.21)        | 96          | 112                     | 1.17        | (0.97-1.40)        |  |
|                       | 8                     | 8          | 12         | 1.5         | (0.84-2.62)        | 112                     | 100         | 0.89        | (0.74-1.09)        | 114         | 119                     | 1.04        | (0.87-1.25)        |  |
|                       | 9                     | 3          | 9          | 3           | (1.59-5.83)        | 127                     | 109         | 0.86        | (0.71-1.03)        | 121         | 127                     | 1.05        | (0.88-1.25)        |  |
|                       | 10                    | 3          | 8          | 2.67        | (1.35-5.35)        | 100                     | 123         | 1.23        | (1.03-1.47)        | 98          | 122                     | 1.24        | (1.04-1.49)        |  |
|                       | <b>Total</b>          | <b>180</b> | <b>189</b> | <b>1.05</b> | <b>(0.91-1.21)</b> | <b>703</b>              | <b>673</b>  | <b>0.96</b> | <b>(0.89-1.03)</b> | <b>902</b>  | <b>896</b>              | <b>0.99</b> | <b>(0.93-1.06)</b> |  |

**Table S7.** Attendance rate of each screening round in the PLCO data (NLST-eligible). The rate was estimated by calculating the fraction of individuals who attended each round of screening among those who are NLST-eligible.

| T* | Attendance Rate |
|----|-----------------|
| 0  | 0.948           |
| 1  | 0.890           |
| 2  | 0.858           |
| 3  | 0.821           |

\* T is screen time (screening round)

**Table S8.** Transition probability for compliance to screening estimated using the PLCO data (NLST-eligible)

| T* | $P_A^{**}$ | $P_{NA}^{***}$ |
|----|------------|----------------|
| 0  | 0.948      | 0.948          |
| 1  | 0.904      | 0.673          |
| 2  | 0.913      | 0.374          |
| 3  | 0.890      | 0.270          |

\* T is screen time (screening round)

\*\* Prob(Attend screening at T=t given that the individual attended screening at T=t-1) for time t=1,2,3 for T=0, it's Prob (Attend screening at T=0)

\*\*\*Prob(Attend screening at T=t given that the individual did not attend screening T=t-1) for t=1,2,3 for T=0, it's Prob (Attend screening at T=0)



# Supplemental Figures

**Figure S1** Natural history model for lung cancer

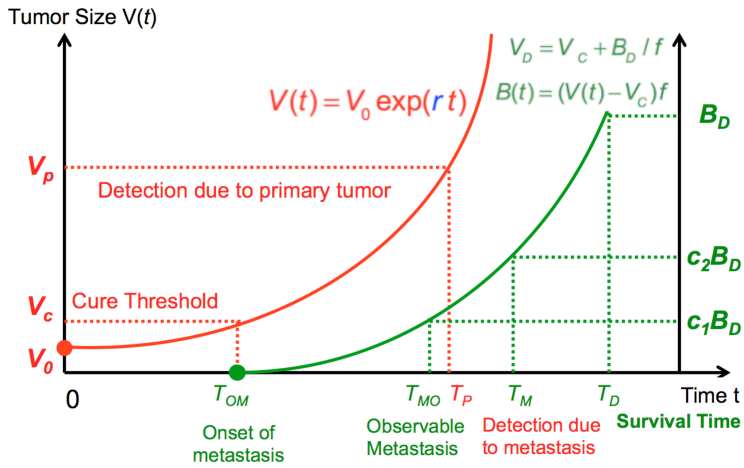

**Figure S2** Estimated survival, stage and tumor size distribution using the natural history model comparing to SEER data (male). Blue color represents SEER data and red color shows predictions using the natural history model.

## Adenocarcinoma

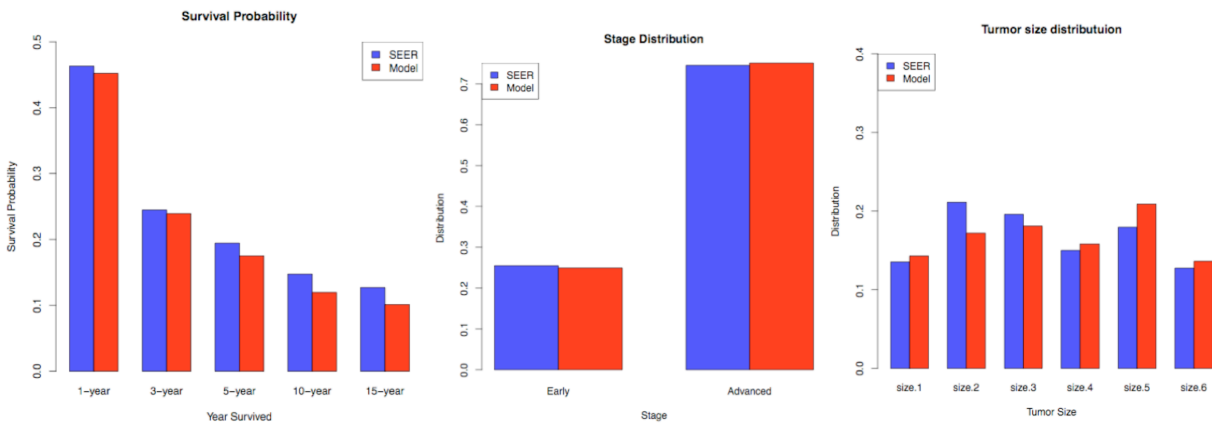

## Squamous

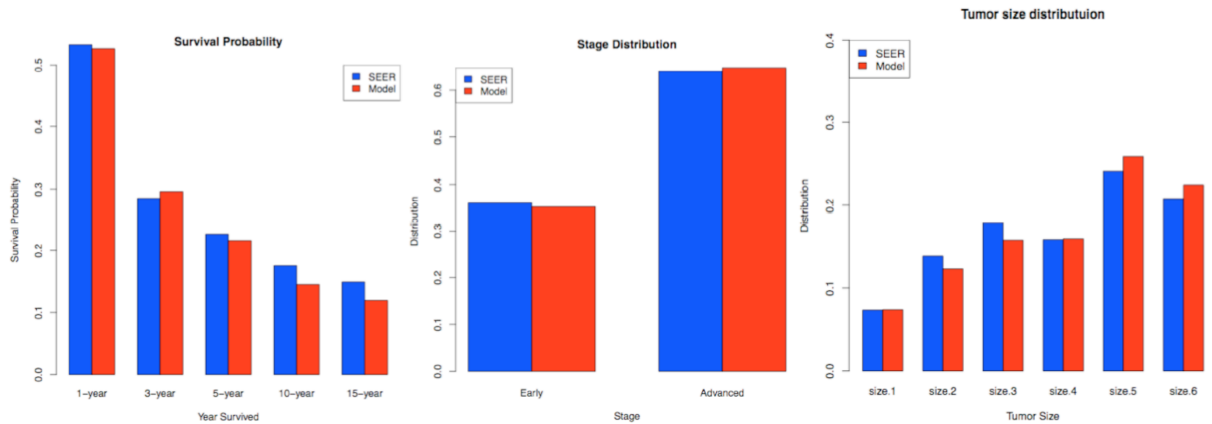

## Large Cell

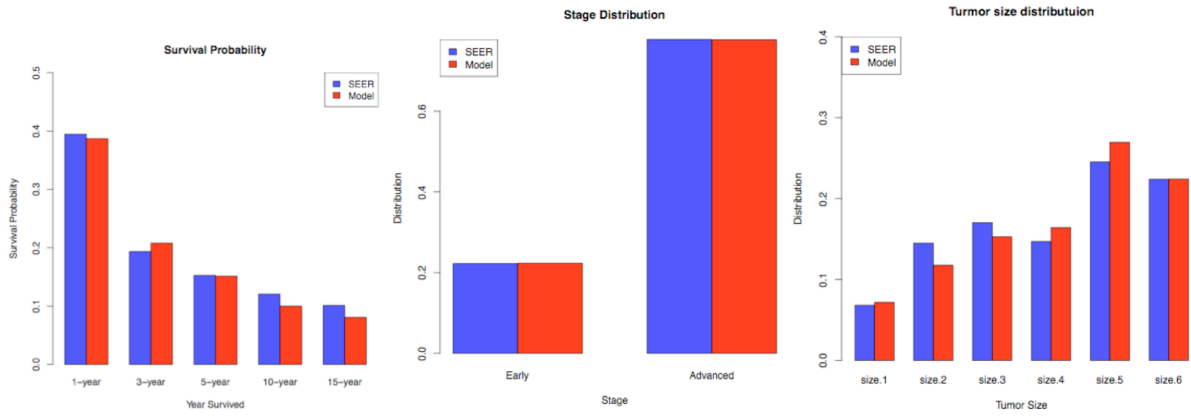

## Small Cell

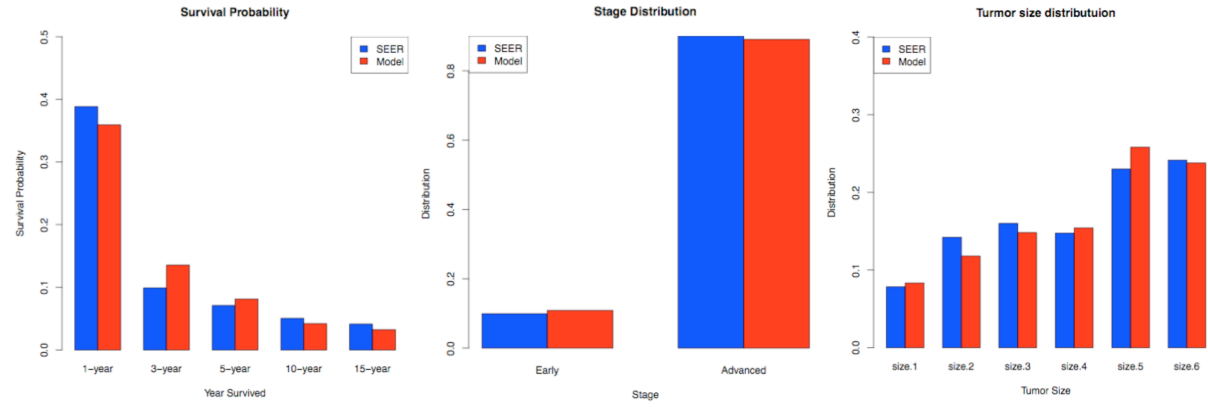

**Figure S3** Model calibration results using NLST data for CXR arm. Cumulative lung cancer incidence and mortality over study time. Observed data is in blue and predicted data is in red. Dotted lines are 95% confidence interval. First row is for lung cancer incidence and second row is for lung cancer death.

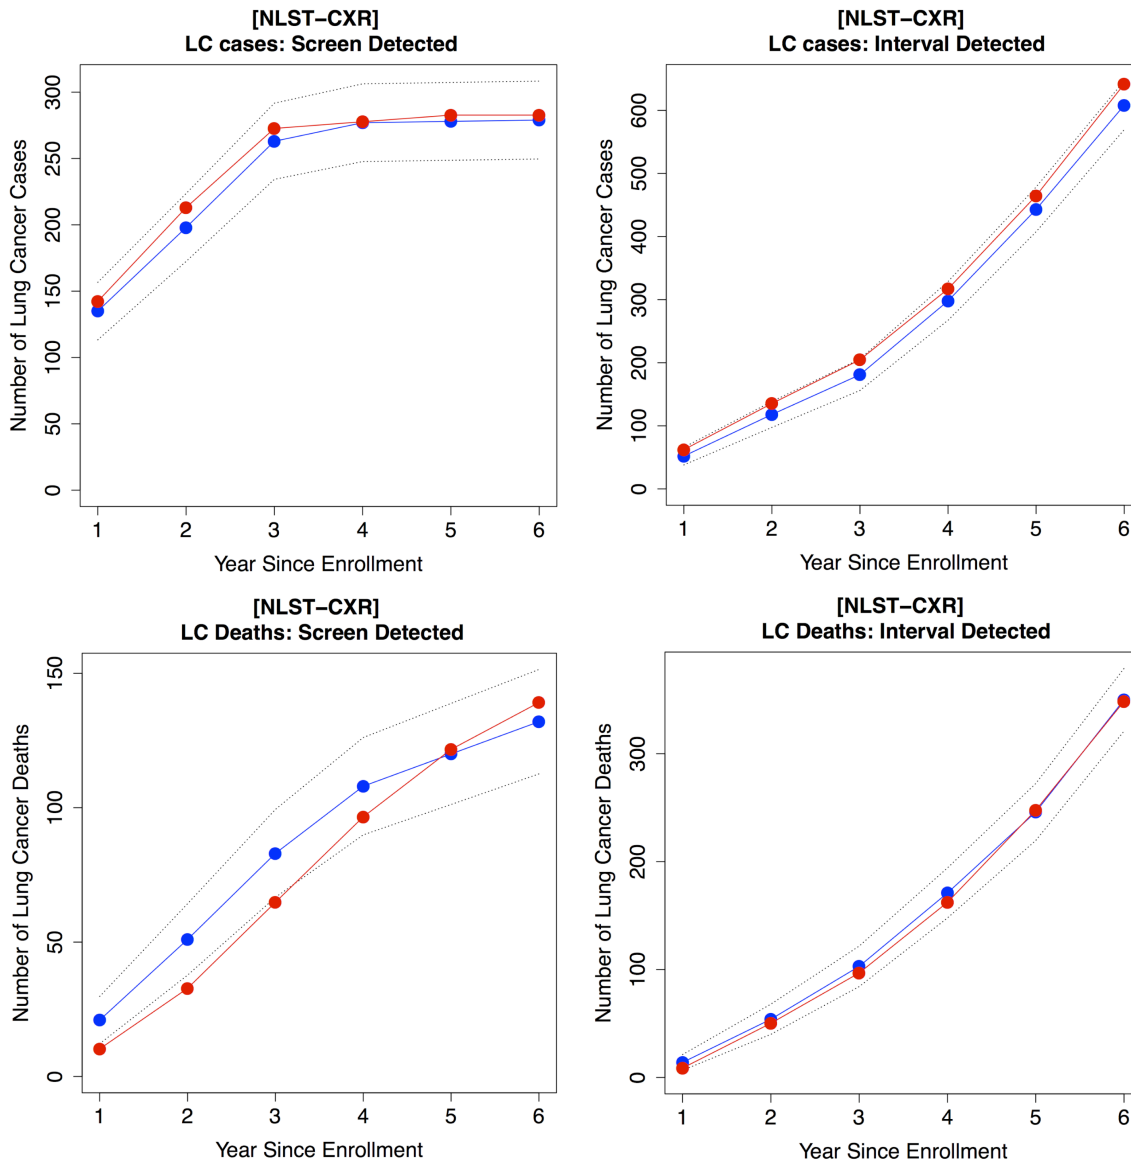

**Figure S4.** Model validation results using the PLCO data for the usual-care arm (control arm). Cumulative lung cancer incidence and mortality over study time. Observed data is in blue and predicted data is in red. Dotted lines are 95% confidence interval. First row is for lung cancer incidence and second row is for lung cancer death.

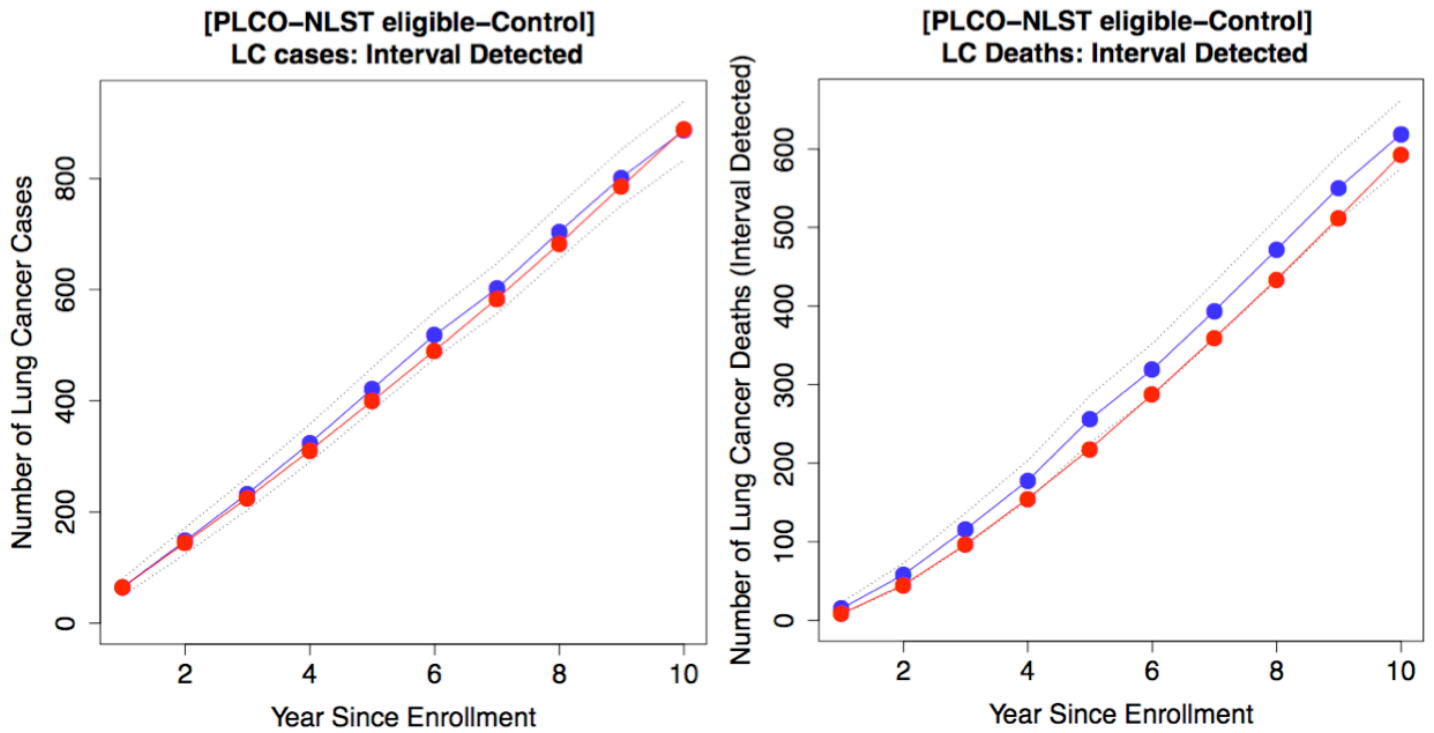

**Figure S5** Compliance rate (attendance rate) of screening of the NLST-like and USPSTF recommended scenarios under imperfect compliance using transition probabilities estimated and projected using PLCO. The attendance rate was estimated using microsimulations, by calculating the fraction of individuals who attended screening for each screening round (screening time) among those who are eligible based on each criterion of the NLST-like and the USPSTF recommended programs.

### Compliance rate by screening round

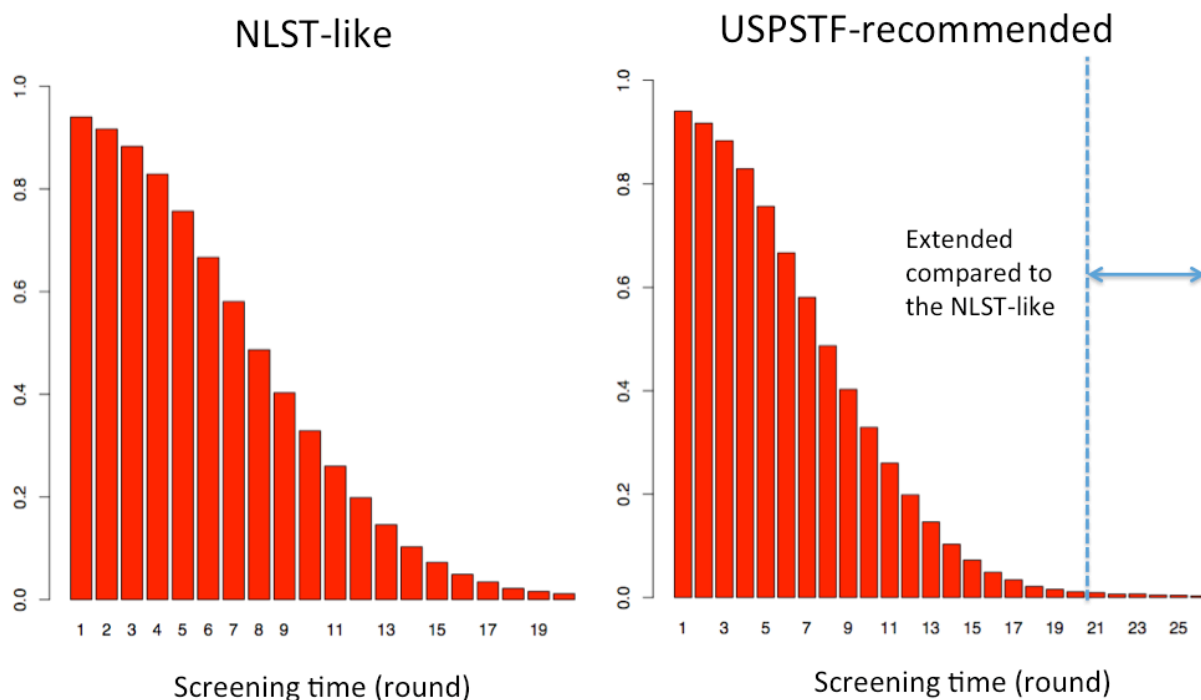

## References for Supplemental Materials

1. Lin RS, Plevritis SK. Comparing the benefits of screening for breast cancer and lung cancer using a novel natural history model. *Cancer Causes & Control*. 2012;23(1):175-85.
2. Koning HJd, Meza R, Plevritis SK, Haaf Kt, Munshi VN, Jeon J, et al. Benefits and harms of computed tomography lung cancer screening programs for high risk populations using evidence from the two largest randomized controlled trials on lung cancer screening; analyses initiated to inform the U.S. Preventive Services Task Force. (Submitted).
3. Meza R, Haaf Kt, Kong CY, Erdogan A, Black W, Tammemagi M, et al. Comparative Analysis of Five Lung Cancer Natural History and Screening Models that Reproduce Outcomes of the NLST and PLCO Trials. (Submitted).
